# Supplementary material for: Genome‐wide functional analysis of hot pepper immune receptors reveals an autonomous NLR clade in seed plants
Source: PubMed Central journal article supplement (PMC7756659; doi:10.1111/nph.16878), 2020-11-16
Supplement: NPH-229-532-s002.pdf [file NPH-229-532-s002.pdf]

**Article title:** Genome-wide functional analysis of hot pepper immune receptors reveals an autonomous NLR cluster in seed plants

**Authors:** Hye-Young Lee, Hyunggon Mang, Eun-Hye Choi, Ye-Eun Seo, Myung-Shin Kim, Soohyun Oh, Saet-Byul Kim, and Doil Choi

**Article acceptance date:** 07 August 2020

**Table S1** Gene orientation and predicted function of an upstream gene of an autoactive pepper NLR

| Autoactive NLR       |        | Upstream gene |        |                                                            |
|----------------------|--------|---------------|--------|------------------------------------------------------------|
| Gene ID (NLR ID)     | Strand | Gene ID       | Strand | Gene description                                           |
| CA11g06220 (NLR502)  | +      | CA11g06230    | +      | Partial TNL-type protein                                   |
| CA12g06200 (NLR504)  | +      | CA12g06190    | -      | Putative nuclease HARBI1-like                              |
| CA12g16200 (NLR582)  | +      | CA00g70880    | -      | Ribosomal protein S11                                      |
| CA12g19860 (NLR530)  | +      | CA12g19850    | +      | Partial TNL-type protein                                   |
| CA12g19870 (NLRT2)   | +      | CA12g19860    | +      | NLR530 (Autoactive TNL)                                    |
| CA12g19890 (NLRT1)   | +      | CA12g19880    | +      | Partial TNL-type protein                                   |
| CA05g05510 (NLR110)  | +      | CA05g05520    | -      | Putative LRR receptor-like serine/threonine-protein kinase |
| CA05g02490 (NLR5)    | +      | CA05g02480    | +      | Partial CNL-type protein (CNL-NG)                          |
| CA01g29850 (NLR287)  | +      | CA01g29860    | +      | CNL-type protein (CNL-NG)                                  |
| CA01g33790 (NLR620)  | +      | CA01g33800    | +      | CNL-type protein (G10)                                     |
| CA01g33850 (NLR10-2) | +      | CA01g33840    | +      | CNL-type protein (G10)                                     |
| CA07g09720 (NLR174)  | +      | CA07g09730    | +      | Pentatricopeptide repeat-containing protein                |
| CA07g12630 (NLR168)  | +      | CA07g12640    | +      | CNL-type protein (CNL-NG)                                  |
| CA08g02000 (NLR95)   | +      | CA08g01990    | +      | Partial NL-type protein                                    |
| CA12g19770 (NLR179)  | +      | CA12g19760    | +      | Phloem protein 2-like protein                              |

**Table S2** List of autoactive NLRs and autoactive N-terminal domains in pepper

| Group   | Full-length NLR (NLR ID) | N-terminal domain (NTD ID) |
|---------|--------------------------|----------------------------|
| TNL     | CA11g06220 (NLR502)      | CA12g19860 (TIR530)*       |
|         | CA12g06200 (NLR504)      | CA12g19870 (TIRT2)*        |
|         | CA12g16200 (NLR582)      |                            |
|         | CA12g19860 (NLR530)*     |                            |
|         | CA12g19870 (NLRT2)*      |                            |
|         | CA12g19890 (NLRT1)       |                            |
| CNL-G5  | CA05g05510 (NLR110)      |                            |
| CNL-G9  | CA05g02490 (NLR5)        |                            |
| CNL-ANL | CA01g29850 (NLR287)*     | CA00g76890 (CC403)         |
|         | CA01g33790 (NLR620)*     | CA01g29850 (CC287)*        |
|         | CA01g33850 (NLR10-2)*    | CA01g33790 (CC620)*        |
|         |                          | CA01g33850 (CC10-2)*       |
|         |                          | CA01g33880 (CC327)         |
|         |                          | CA01g33900 (CC466)         |
|         |                          | CA04g10720 (CC585)         |
|         |                          | CA09g17050 (CC380)         |
|         |                          | CA09g17080 (CC436)         |
|         |                          | CA09g17090 (CC773)         |
|         |                          | CA10g20540 (CC328)         |
|         |                          | CA10g20630 (CC333)         |
|         |                          | CA10g20820 (CC223)         |
|         |                          | CA10g21090 (CC398)         |
|         | CA10g21120 (CC309)       |                            |
|         | CA10g21170 (CC322)       |                            |
|         | CA10g21380 (CC516)       |                            |
| CNL-G11 | CA07g09720 (NLR174)      | CA03g00800 (CC281)         |
| CNL-RNL |                          | CA02g25800 (RPW595)        |
|         |                          | CA04g19370 (RPW405)        |
| CNL-NG  | CA07g12630 (NLR168)      |                            |
|         | CA08g02000 (NLR95)       |                            |
|         | CA12g19770 (NLR179)      |                            |

\*: The gene that both full length NLR and their N-terminal domain show autoactivity in *Nicotiana benthamiana*

**Table S3** CC<sup>A</sup>s of other Solanaceae plants as well as rice and *Arabidopsis* are also capable of inducing cell death in *N. benthamiana*.

|              | Assigned ANLs | Tested CC <sup>A</sup> | Autoactive CC <sup>A</sup> domain (%) |
|--------------|---------------|------------------------|---------------------------------------|
| Pepper       | 34            | 24                     | 17 (70.8)                             |
| Potato       | 32            | 8                      | 5 (62.5)                              |
| Tomato       | 15            | 8                      | 5 (62.5)                              |
| Tobacco      | 8             | 4                      | 3 (75)                                |
| Rice         | 13            | 8                      | 4 (50)                                |
| Arabidopsis* | 23            | 22                     | 13 (59.1)                             |

\* This result is quote from Wroblewski et al., (2019).

**Table S4** Identification of head-to-head oriented NLR genes in pepper genome.

| Gene ID                     | Type <sup>a</sup> | Group <sup>b</sup> | Autoactivity <sup>c</sup> | Integrated domain | Upstream gene               |                   |                    |                           |                   |
|-----------------------------|-------------------|--------------------|---------------------------|-------------------|-----------------------------|-------------------|--------------------|---------------------------|-------------------|
|                             |                   |                    |                           |                   | Gene ID                     | Type <sup>a</sup> | Group <sup>b</sup> | Autoactivity <sup>c</sup> | Integrated domain |
| CA.PGAv.1.6.scaffold137.47  | N                 | N.A.               | N.D                       |                   | CA.PGAv.1.6.scaffold137.46  | N                 | N.A.               | N.D                       |                   |
| CA.PGAv.1.6.scaffold282.124 | CNL               | G9                 | N                         |                   | CA.PGAv.1.6.scaffold282.123 | CNL               | G9                 | N                         |                   |
| CA.PGAv.1.6.scaffold309.40  | CNL               | G4                 | N                         |                   | CA.PGAv.1.6.scaffold309.39  | CNL               | G4                 | N                         |                   |
| CA.PGAv.1.6.scaffold551.100 | CN                | N.A.               | N.D                       |                   | CA.PGAv.1.6.scaffold551.99  | CNL               | G2                 | N                         |                   |
| CA.PGAv.1.6.scaffold676.64  | CNL               | G7                 | N                         |                   | CA.PGAv.1.6.scaffold676.63  | N                 | N.A.               | N.D                       |                   |
| CA.PGAv.1.6.scaffold767.32  | CNL               | G3                 | N                         | SD                | CA.PGAv.1.6.scaffold767.31  | CNL               | G3                 | N                         | SD                |
| CA.PGAv.1.6.scaffold1084.23 | XN                | N.A.               | N.D                       | NACK_C            | CA.PGAv.1.6.scaffold1084.22 | CNL               | G2                 | N                         |                   |
| CA.PGAv.1.6.scaffold1090.4  | CNL               | G2                 | N                         |                   | CA.PGAv.1.6.scaffold1090.3  | CNL               | G2                 | N                         |                   |
| CA.PGAv.1.6.scaffold1090.13 | N                 | N.A.               | N                         |                   | CA.PGAv.1.6.scaffold1090.11 | CNL               | G2                 | N                         |                   |
| CA.PGAv.1.6.scaffold1090.34 | CNL               | G12                | N                         |                   | CA.PGAv.1.6.scaffold1090.33 | CNL               | G2                 | N                         |                   |
| CA.PGAv.1.6.scaffold1090.37 | XN                | N.A.               | N.D                       | Haem-oxygenase    | CA.PGAv.1.6.scaffold1090.36 | N                 | N.A.               | N                         |                   |
| CA.PGAv.1.6.scaffold1357.10 | CNL               | G2                 | N                         |                   | CA.PGAv.1.6.scaffold1357.9  | CNL               | G2                 | N                         |                   |
| CA.PGAv.1.6.scaffold1357.16 | CNL               | G2                 | N                         |                   | CA.PGAv.1.6.scaffold1357.15 | CNL               | G2                 | N                         |                   |
| CA.PGAv.1.6.scaffold1373.15 | CNL               | G2                 | N.D                       |                   | CA.PGAv.1.6.scaffold1373.14 | N                 | N.A.               | N.D                       |                   |
| CA.PGAv.1.6.scaffold1578.13 | CNL               | G2                 | N                         |                   | CA.PGAv.1.6.scaffold1578.12 | CNL               | G2                 | N                         |                   |
| CA.PGAv.1.6.scaffold1640.8  | CN                | N.A.               | N.D                       |                   | CA.PGAv.1.6.scaffold1640.7  | CNL               | G2                 | N                         |                   |
| CA.PGAv.1.6.scaffold1646.8  | ANL               | ANL                | N                         |                   | CA.PGAv.1.6.scaffold1646.7  | CNL               | G1                 | N                         |                   |
| CA.PGAv.1.6.scaffold1677.2  | N                 | N.A.               | N                         |                   | CA.PGAv.1.6.scaffold1677.1  | XN                | N.A.               | N.D                       | NACK_C            |
| CA.PGAv.1.6.scaffold1982.2  | NL                | N.A.               | N.D                       |                   | CA.PGAv.1.6.scaffold1982.1  | N                 | N.A.               | N.D                       |                   |

<sup>a</sup>NLR type: CNL, CC-NBARC-LRR; ANL, ancient and autonomous NLR; N, NBARC; CN, CC-NBARC; NL, NBARC-LRR; XN, extra domain-NBARC

<sup>b</sup>Group: N.A., Not assigned; N, No autoactivity

<sup>c</sup>Autoactivity: N.D, Not determined; N, No autoactivity



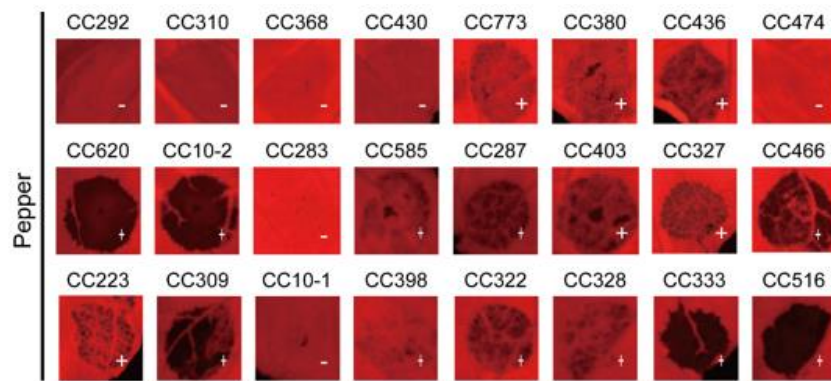

**Fig. S1 Cell death induced by pepper CCAs in *N. benthamiana*.** 24 CC<sup>A</sup> of pepper ANLs were transiently overexpressed in *N. benthamiana*. Images were taken at 3 days after infiltration. Cell death and no visible cell death are presented + and -, respectively. Experiments were repeated three times. n=10.

(a)

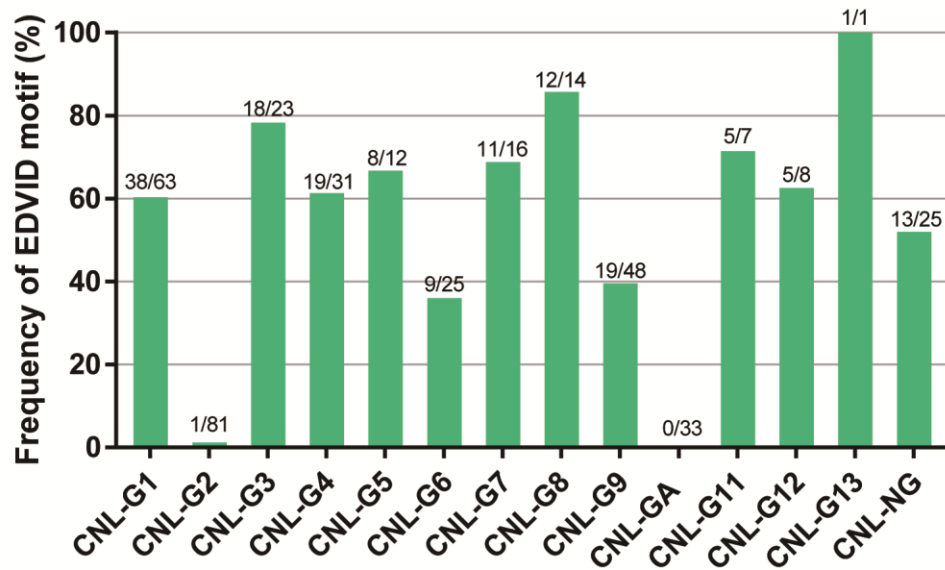

(b)

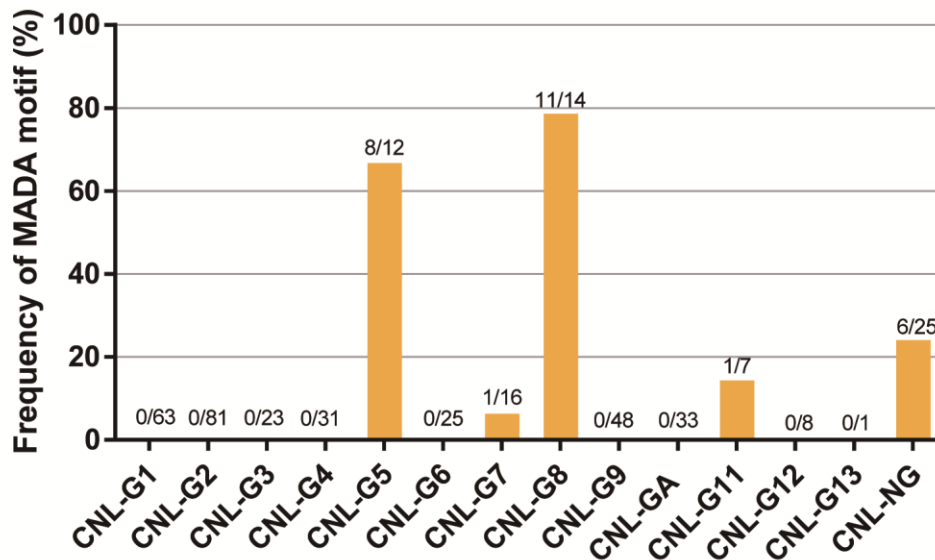

**Fig. S2 Prediction of EDVID or MADA motif in CC domains in pepper NLRs** The frequency of EDVID motif (a) and MADA motif (b) in CC domains for each groups. EDVID motif (motif\_16 from NLR-Parser) and MADA-HMM from Adachi *et al.*, 2019 were used to scan pepper NLRs. An HMM score cut-off was followed by Adachi *et al.*, 2019.



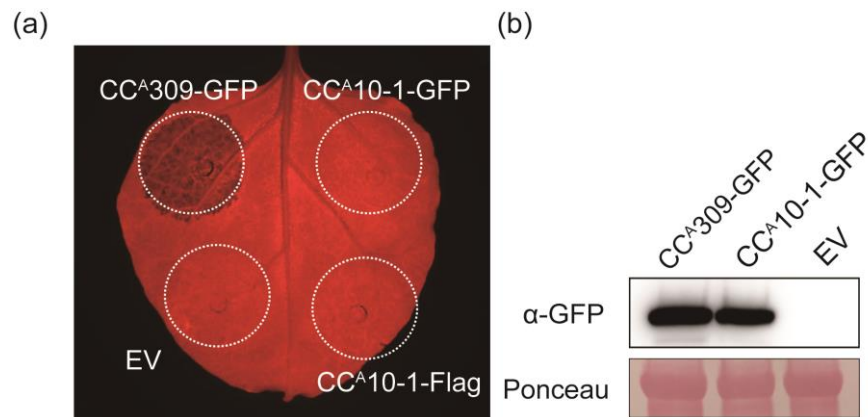

**Fig. S3 Cell death phenotype of GFP-tagged CC<sup>A</sup>309 and CC<sup>A</sup>10-1.** (a) CC<sup>A</sup>309-GFP and CC<sup>A</sup>10-1-GFP were expressed in *N. benthamiana* leaves by Agroinfiltration with an empty vector (EV) as a negative control. Images were taken 2 days post infiltration. (b) Protein accumulation was examined by western blot analysis. Equal protein loading was confirmed by membrane staining by ponceau solution.

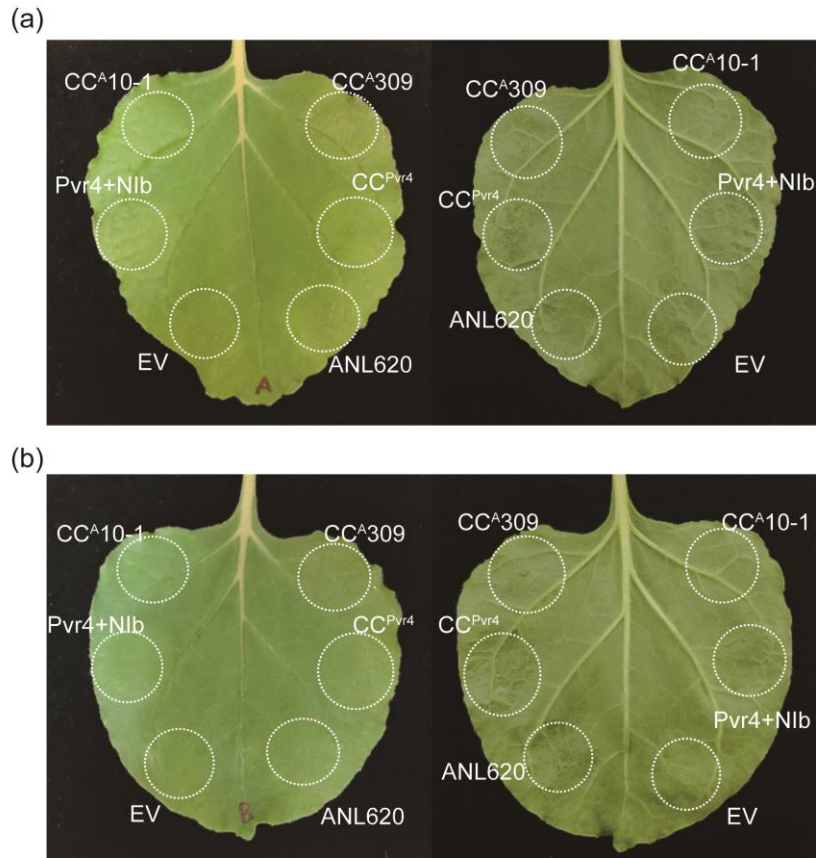

**Fig. S4 No visible cell death in the leaves expressing CC<sup>A</sup>s and ANLs with pCAMBIA2300:GFP or PVX:GFP.** Leaves were infiltrated pCAMBIA2300:GFP (a) or PVX:GFP (b) with ANLs or CC<sup>A</sup>s. Right panel represents adaxial side and left panel shows abaxial side. Same leaves used in Figure 1e were photographed under white light condition 30 hr after agroinfiltration. n=8.

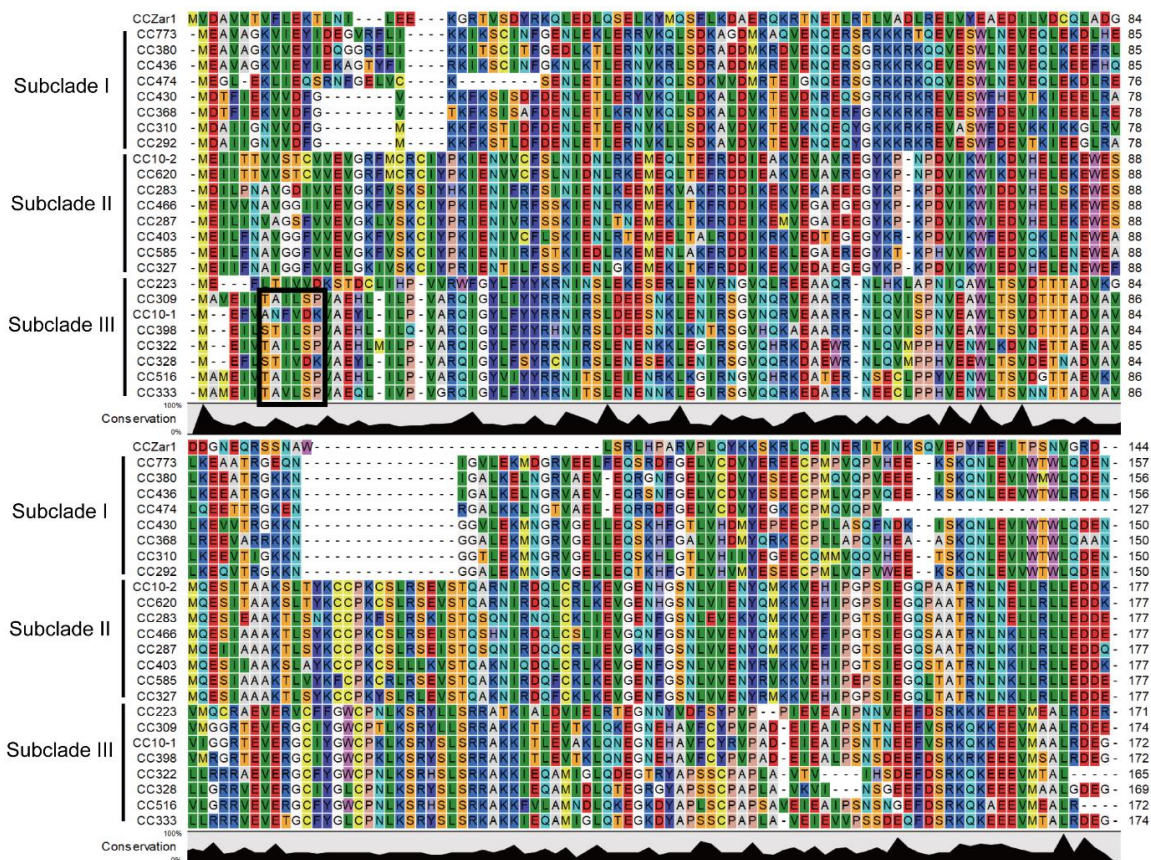

**Fig. S5** Alignment of amino acid sequences of pepper CCAs. Amino acid sequences of 24 pepper CCAs and the CC domain of *Arabidopsis* ZAR1 were used for sequence alignment. Alignment were conducted by CLC workbench software. The conserved motif (TAILSP) in clade III was presented in a black box.

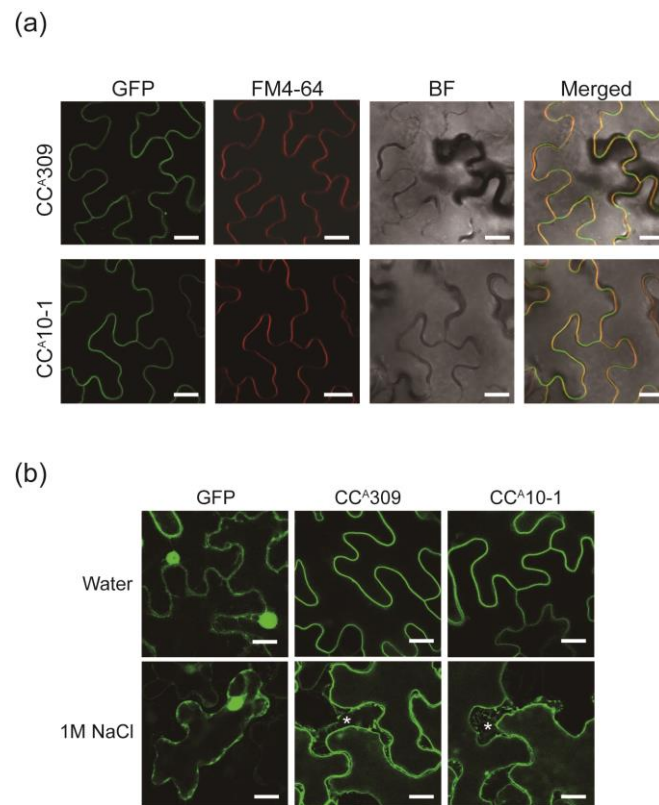

**Fig. S6 CC<sup>A</sup>309 and CC<sup>A</sup>10-1 localize to plasma membrane.** (a) Co-localization of CC<sup>A</sup>309-GFP and CC<sup>A</sup>10-1-GFP with FM 4-64-labeled PM. Confocal microscopy images were taken at 26 hpi; bar = 20  $\mu$ m. (b) Plasmolyzed cells by 1M NaCl solution. Asterisks indicate Hechtian strands.

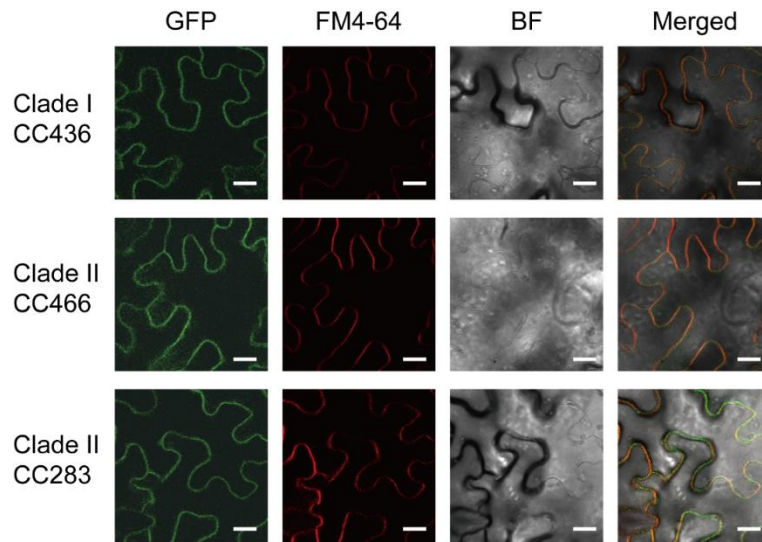

**Fig. S7 CC<sup>A</sup>s in subclade I and II also localize at plasma membrane regardless of their cell death inducing activity.** Autoactive CC<sup>A</sup>436 in subclade I, autoactive CC<sup>A</sup>466 in subclade II and non-autoactive CC<sup>A</sup>283 in subclade II were chosen to explore their subcellular localization. GFP was fused to these proteins at C-terminus and GFP-fused proteins were expressed in *N. benthamiana*. GFP signal was observed by confocal microscopy at 48 hr after infiltration. FM 4-64 dye was used as a PM-marker fluorescence dye. Bar=20  $\mu$ m.

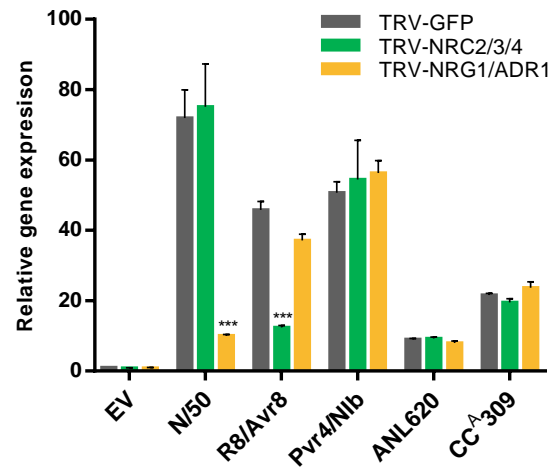

**Fig. S8 The level of *PRI* transcripts in NLR- or CC<sup>A</sup>-expressing cells in known helper NLR-silenced plants.** Expression level of *PRI* was measured by qRT-PCR in leaf tissue infiltrated *Agrobacteria* carrying ANLs (Pvr4, ANL620) or CC<sup>A</sup> (CC<sup>A</sup>309). Leaf tissue was collected at 36 hpi and RNA was extracted from collected tissue. N/p50 and R8/Avr8 were used for *NRG1*- or *NRCs*-dependent resistance gene, respectively. Significance was determined using one-way ANOVA followed by Tukey's multiple comparisons test, with asterisks denoting statistically significant differences: \*\*\*P < 0.0001. Data are the mean ( $\pm$  SD) of four biological replicates. Error bars indicate standard deviation.

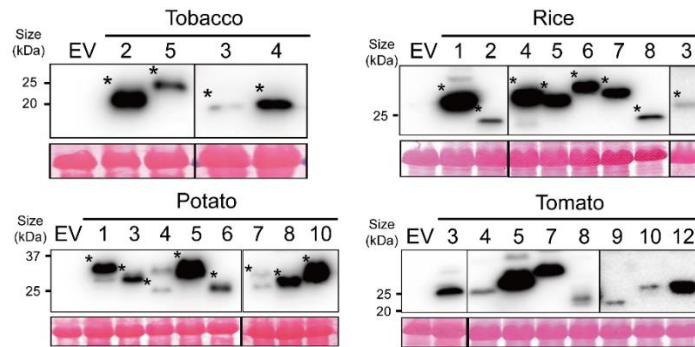

**Fig. S9** The protein expression level of CCAs from tobacco, rice, potato and tomato Protein accumulation were analyzed by immunoblot. Asterisks indicate the expected band of proteins. Equal protein loading was confirmed by Ponceau S stained membrane.

## References

**Adachi H, Contreras M, Harant A, Wu C, Derevnina L, Sakai T, Duggan C, E. M, Bozkurt TO, Maqbool A, et al. 2019a.** An N-terminal motif in NLR immune receptors is functionally conserved across distantly related plant species. *Elife* **8**. e49956.

**Wroblewski T, Spiridon L, Martin EC, Petrescu AJ, Cavanaugh K, Truco MJ, Xu H, Gozdowski D, Pawlowski K, Michelmore RW, et al. 2018.** Genome-wide functional analyses of plant coiled-coil NLR-type pathogen receptors reveal essential roles of their N-terminal domain in oligomerization, networking, and immunity. *PLoS Biology* **16**(12): e2005821.
